# Supplementary material for: Crystal structure of human S100A8 in complex with zinc and calcium
Source: Springer Nature journal article supplement (doi:10.1186/s12900-016-0058-4), 2016-06-01

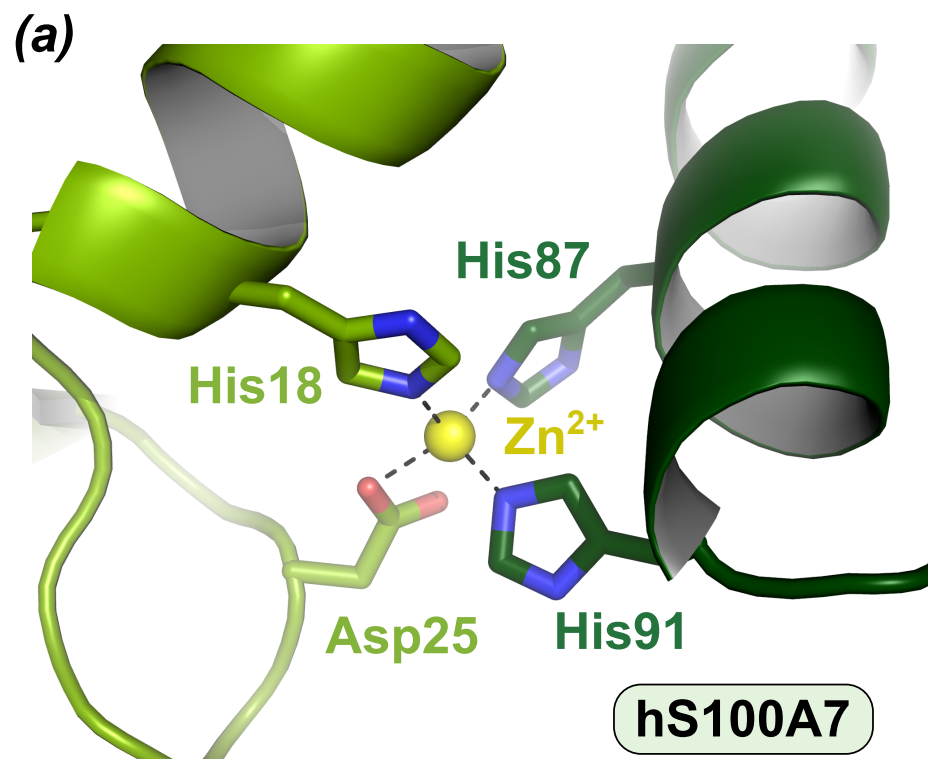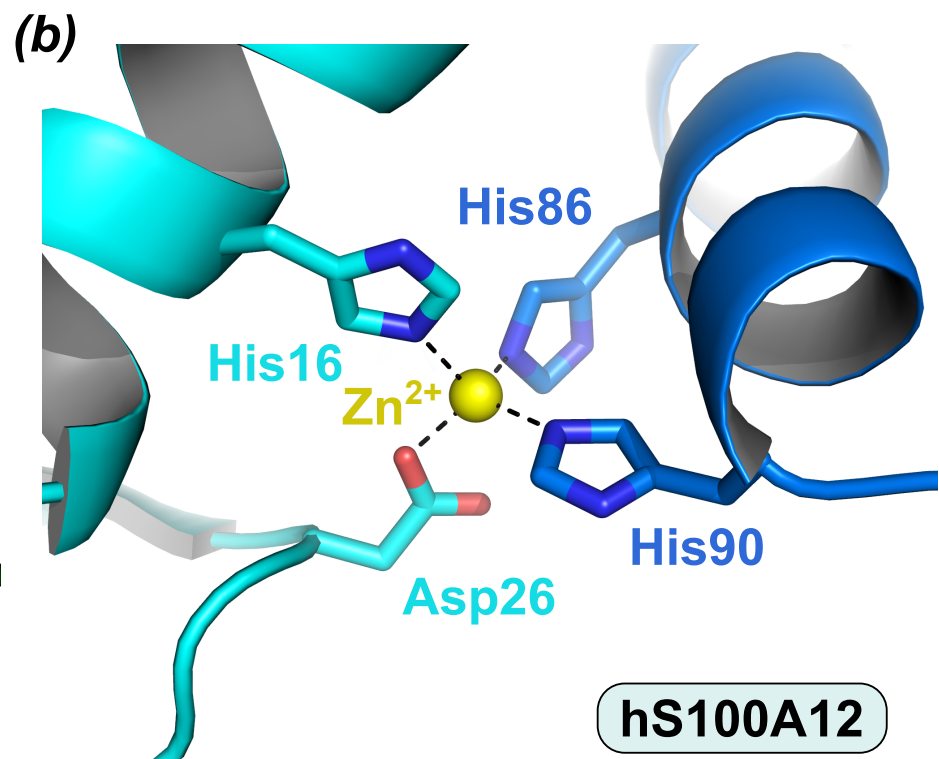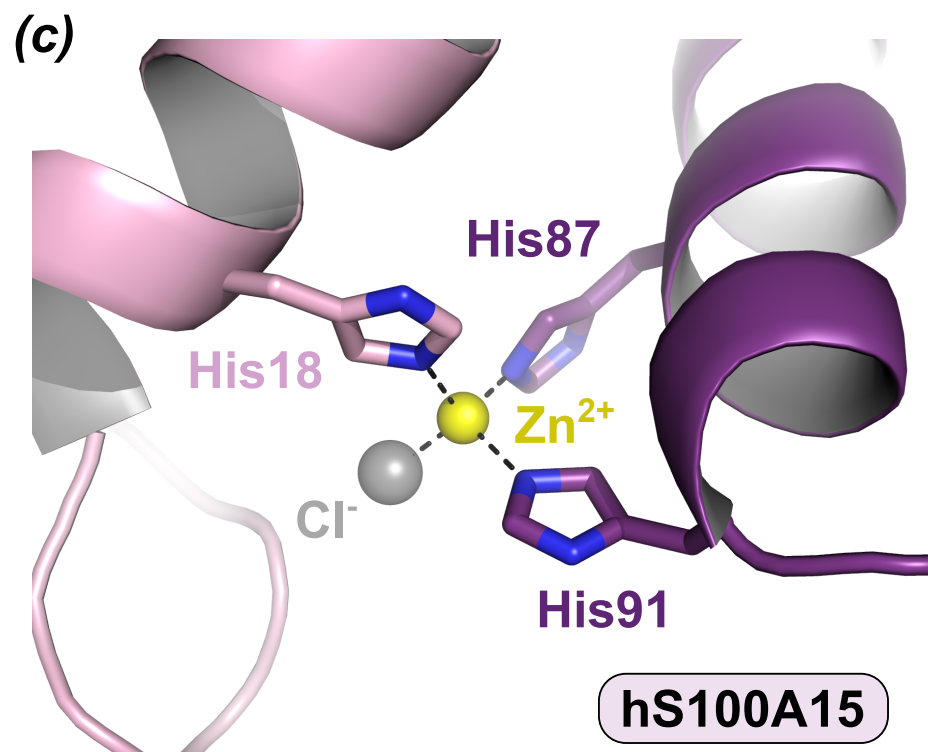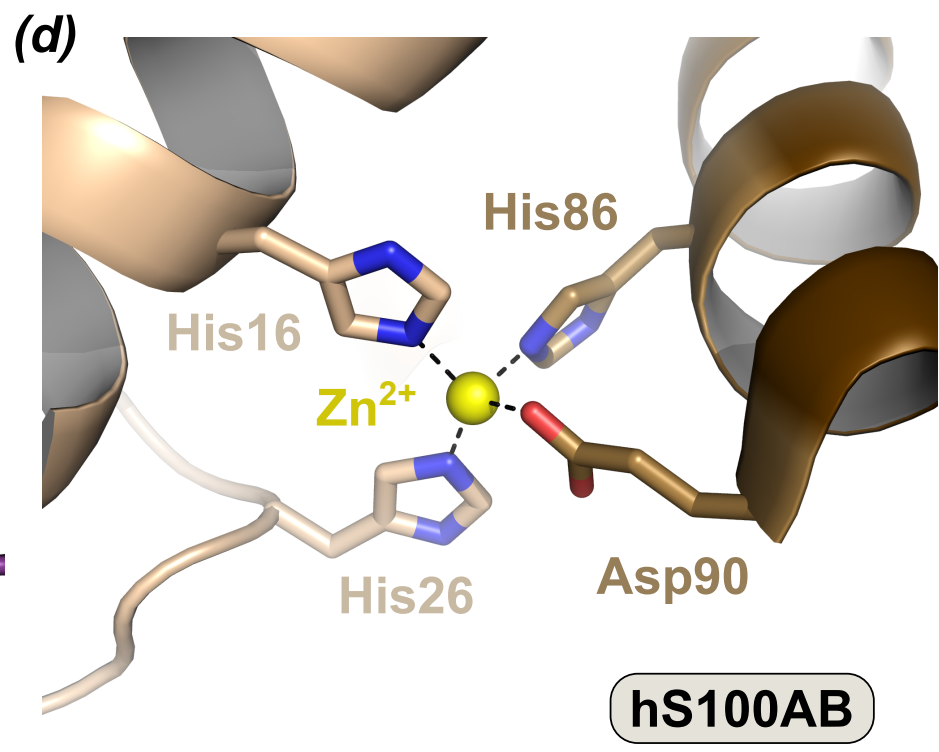

Supplement: MOESM3 [file 12900_2016_58_MOESM3_ESM.pdf]
