# Supplementary material for: Crystal structure of human S100A8 in complex with zinc and calcium
Source: Springer Nature journal article supplement (doi:10.1186/s12900-016-0058-4), 2016-06-01
Supplement: MOESM4 [file 12900_2016_58_MOESM4_ESM.pdf]

**(a)**

| Protein standard   | Molecular Weight ( $M_w$ ) in Da | Elution Volume $V_E$ (in ml) |
|--------------------|----------------------------------|------------------------------|
| Blue Dextran       | $V_0$                            | 8.91                         |
| BSA                | 66500                            | 10.77                        |
| Carbonic Anhydrase | 29000                            | 12.75                        |
| Cytochrome c       | 12400                            | 14.37                        |
| Aprotinin          | 6500                             | 16.30                        |

 $V_C = 24$  ml**(b)**

$$K_{AV} = \frac{V_E - V_0}{V_C - V_0}$$

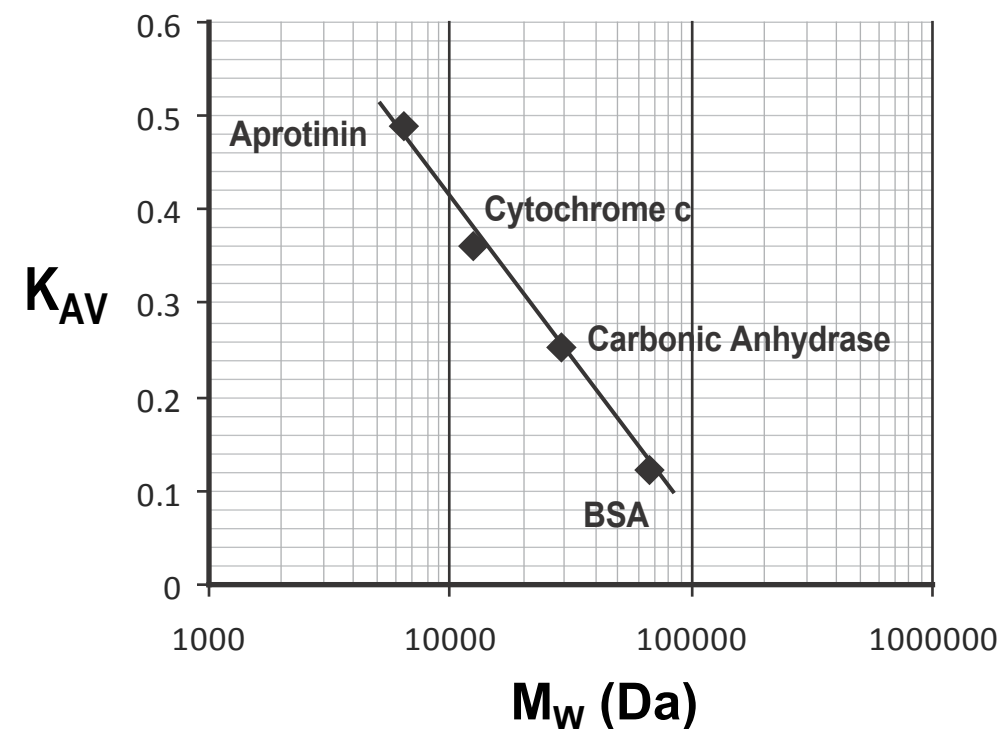**(c)**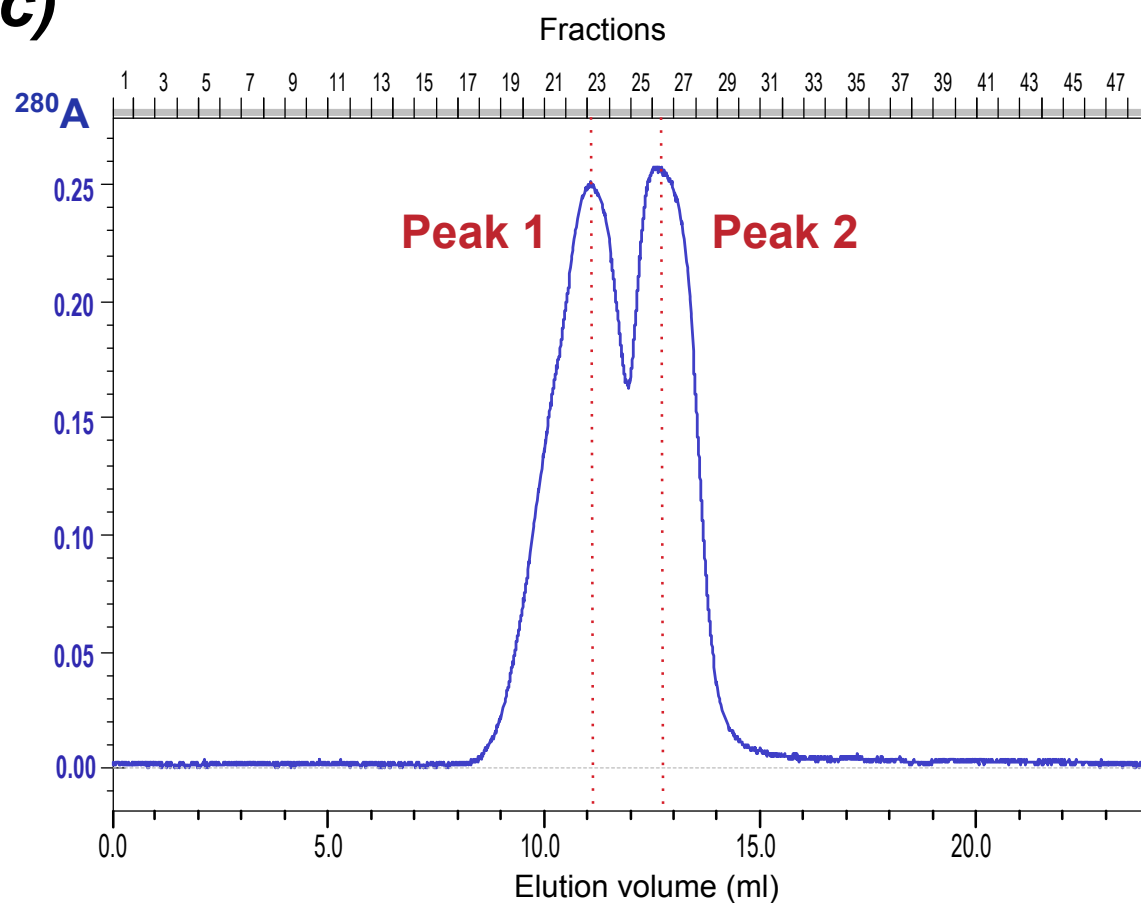**(d)**

$$K_{AV} = -0.3538 * \log(M_w) + 1.8276$$

| hS100A8 species from SEC | Measured Elution Volume $V_E$ (in ml) | Extrapolated Molecular Weight ( $M_w$ ) in Da | Corresponding number of hS100A8 dimers |
|--------------------------|---------------------------------------|-----------------------------------------------|----------------------------------------|
| Peak 1                   | 11.15                                 | 55726                                         | 2.55                                   |
| Peak 2                   | 12.80                                 | 27353                                         | 1.25                                   |
